# Supplementary material
Source: PubMed Central journal article supplement (PMC1808539)
Supplement: NIHMS10752-supplement-Stbl1.pdf [file NIHMS10752-supplement-Stbl1.pdf]

**(E)-Table 1 - Ohtake et al. PCR primer and probe sequences, expected product sizes, and annealing conditions for synuclein exon amplifications and TaqMan analysis**

| Primers     | Forward                  | Reverse                  | PCR (bp) | T <sub>m</sub> (°C) | Ref.   | Gene Bank # |
|-------------|--------------------------|--------------------------|----------|---------------------|--------|-------------|
| a3f/a3r     | gtctcacactttggagggttc    | cacctacctacatacctctgactc | 395      | 60                  | 23     | U46897      |
| a4f/a4r     | gctaatacagcaatthaaggctag | gatatgttcttagatgctcag    | 216      | 60                  | 23     | U46898      |
| a5f/a5r     | cgatggctagtggaggtgg      | ccccacagtaagtatcttgc     | 325      | 60                  | 23 / * | U46899      |
| a6f/a6r     | cggaggcattgtggagtttag    | ccacgtaatgagcatgtagagagc | 373      | 60                  | 23     | U46990      |
| a7-2f/a7-1r | atgatcattaaatgggtgatccg  | tcactgctgatggaagacttcg   | 431      | 60                  | *      | U46901 / *  |
| b2f/b2r     | agtgaccgggtccccgtgtatc   | agccctgcagccccagaaac     | 198      | 65                  | 24     | AF053134    |
| b3f/b3r     | cagcgcagagtccttaaatg     | cgccagatcatccgcctaa      | 139      | 55                  | 24     | AF053135    |
| b4f/b4r     | ttccccctggctcccaaac      | ctgcatgtgcgggtcagaag     | 197      | 60                  | 24     | AF053135    |
| b5f/b5r     | tcctcacgagtctctgacctt    | agctagggacggcagcaatca    | 186      | 60                  | 24     | AF053136    |
| b6f/b6r     | aaactcctcctcttttgc       | cgctcctcggatcttcgtt      | 403      | 55                  | 24     | AF053136    |

\* We developed primers A5R and A7-1R based upon sequence information present in Genbank. The A7-2F primer sequence did not appear in Genbank. We therefore generated the A7-2F primer after sequencing this region of the  $\alpha$ -synuclein gene using previously described primer information (21).

PCR = polymerase chain reaction product size

T<sub>m</sub> = melting temperature; used as the annealing temperature for the PCR

Ref. = number of reference

**Primers for V70M allele detection:**

SNCB-Taq-4F 5'-ggatcgcttaccttcagatcagtag-3'

SNCB-Taq-4R 5'-accaaggaacaggcctcacat-3'

**Taqman Probes for V70M detection:**

Wild type: SNCB-MGB-W (FAM)-AGAGAACACAGCTCC

Mutant allele: SNCB-MGB-V (VIC)-AGAACATAGCTCCTCCCA

PCR conditions for allelic discrimination analysis:

Stage 1: UNG activation --- 50°C, 2 min

Stage 2: AmpliTaq Gold activation --- 95°C, 10 min

Stage 3: PCR (35 cycles) --- denature 92°C, 15 sec; anneal/extend 60°C, 1 min

**{for questions regarding this data, email [laspada@u.washington.edu](mailto:laspada@u.washington.edu)}**
